# Supplementary material
Source: ML conference proceedings conference paper supplement (https://openaccess.thecvf.com/content/WACV2024/html/Kang_MetaSeg_MetaFormer-Based_Global_WACV_2024_paper.html)
Supplement: Supplementary file 1 [file Kang_MetaSeg_MetaFormer-Based_Global_WACV_2024_supplemental.pdf]

# MetaSeg: MetaFormer-based Global Contexts-aware Network for Efficient Semantic Segmentation

Beoungwoo Kang\*, Seunghun Moon\*, Yubin Cho\*, Hyunwoo Yu\*, and Suk-Ju Kang  
Sogang University, Republic of Korea

{beoungwoo, moonsh97, dbqls1219, hyunwoo137, sjkang}@sogang.ac.kr

## Appendix

- In Section A, we provide additional experiments on adopting Transformer-based encoder as a backbone in the proposed MetaSeg network.
- In Section B, we provide a comparison of our MetaSeg with other segmentation networks.
- In Section C, we provide additional results on the inference speed (FPS).
- In Section D, we provide additional qualitative results compared with the proposed and previous model on ADE20K, Cityscapes, COCO-Stuff and Synapse datasets.
- Code and README file were submitted as a zip file for reproducibility.

## A. Effectiveness of Our MetaSeg for Various Transformer-based Backbone

In Table 1, we conducted the experiment on using the Transformer-based encoder as a backbone of our MetaSeg. Previously, Mix Transformer (MiT) [8] and Lite Vision Transformer (LVT) [9] backbones adopt SegFormer [8] as its semantic segmentation decoder. Compared to SegFormer [8], our MetaSeg remarkably reduces the computational costs (GFLOPs) by 53.6 % and 43.4 % with mIoU improvements of 1.9% and 0.4% for MiT [8] and LVT [9], respectively. These results indicate that the Transformer-based backbones as well as the CNN-based backbones can effectively leverage our MetaSeg for efficient semantic segmentation task.

## B. Comparison of Our MetaSeg with Other Semantic Segmentation Networks

In Table 2, we compared our method with other segmentation networks to demonstrate the power of our MetaSeg.

\*These authors contributed equally.

| Backbone | Method                | Params (M) | ADE20K     |             |
|----------|-----------------------|------------|------------|-------------|
|          |                       |            | GFLOPs ↓   | mIoU (%) ↑  |
| MiT [8]  | SegFormer [8]         | 3.8        | 8.4        | 37.4        |
|          | <b>MetaSeg (Ours)</b> | <b>4.1</b> | <b>3.9</b> | <b>39.3</b> |
| LVT [9]  | SegFormer [8]         | 3.9        | 10.6       | 39.3        |
|          | <b>MetaSeg (Ours)</b> | <b>4.2</b> | <b>6.0</b> | <b>39.7</b> |

Table 1. Effectiveness of our MetaSeg for Transformer-based backbones on ADE20K validation set.

| Method                | Params (M) | GFLOPs ↓   | mIoU (%) ↑  |
|-----------------------|------------|------------|-------------|
| FCN [5]               | 9.8        | 39.6       | 19.7        |
| PSPNet [10]           | 13.7       | 53.0       | 29.7        |
| DeepLabV3 [1]         | 18.7       | 75.4       | 34.1        |
| DeepLabV3+ [2]        | 15.4       | 69.5       | 34.0        |
| <b>MetaSeg (Ours)</b> | <b>3.4</b> | <b>4.6</b> | <b>34.7</b> |

Table 2. Comparison of our MetaSeg with other segmentation Networks on ADE20K dataset. For a fair comparison, we use the same backbone, MobileNetV2 [6].

| Method                  | Params(M)  | Cityscapes  |             |               |
|-------------------------|------------|-------------|-------------|---------------|
|                         |            | GFLOPs ↓    | mIoU (%) ↑  | FPS (img/s) ↑ |
| SegFormer-B0 [8]        | 3.8        | 125.5       | 76.2        | 12.52         |
| FeedFormer-B0 [7]       | 4.5        | 107.4       | 77.9        | 17.33         |
| SegNeXt-T [3]           | 4.3        | 50.5        | 79.8        | 22.73         |
| <b>MetaSeg-T (Ours)</b> | <b>4.7</b> | <b>47.9</b> | <b>80.1</b> | <b>23.46</b>  |

Table 3. Comparison of our MetaSeg with previous state-of-the-art methods on Cityscapes.

We experimented with the same backbone for a fair comparison. Compared to other networks, our model showed significant computational reduction with higher mIoU performance. This result indicates that our MetaSeg is a powerful and efficient segmentation network by leveraging the MetaFormer block that uses our efficient CRA module as a token mixer.

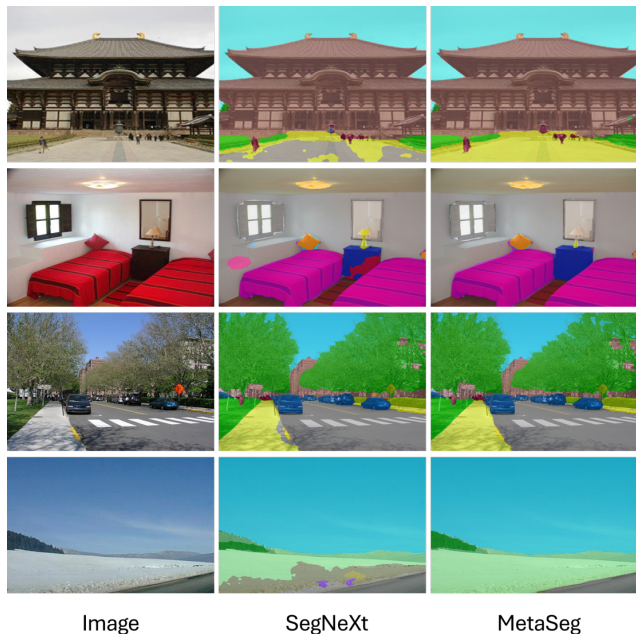

Figure 1. Qualitative results on ADE20K. Compared to the previous state-of-the-art method, our MetaSeg generates more accurate segmentation maps across various categories.

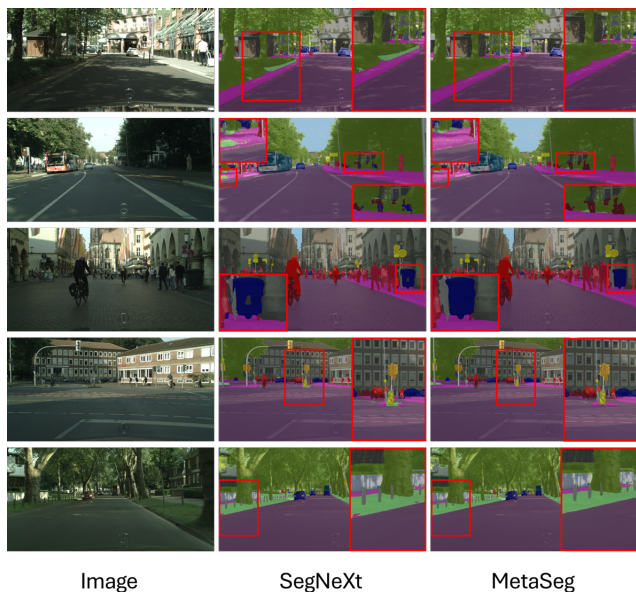

Figure 2. Qualitative results on Cityscapes. For multiple categories, our MetaSeg provides more precise predictions than SegNeXt [3].

### C. Inference Speed Comparison

In Table 3, we represent the inference speed comparisons under the mmsegmentation code base without any additional accelerating techniques. We tested Frame Per Sec-

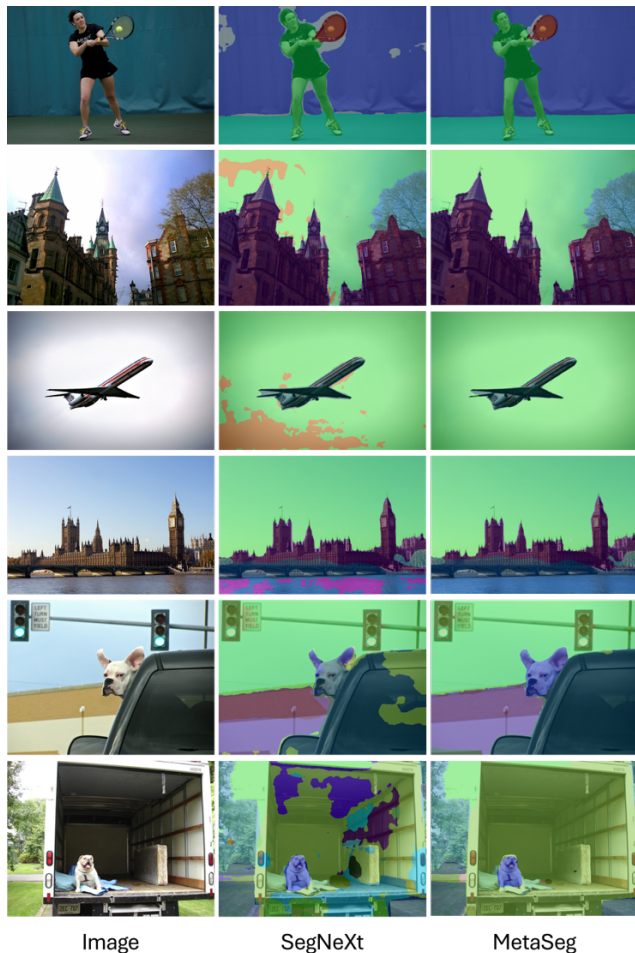

Figure 3. Qualitative results on COCO-Stuff. Compared to SegNeXt [3], our MetaSeg provides more detailed segmentation predictions.

ond (FPS) of a single image of  $1024 \times 2048$  on Cityscapes test dataset using a single RTX3090 GPU. The results show that our MetaSeg is fastest compared with other lightweight semantic segmentation models [3, 7, 8], while achieving the highest mIoU performance.

### D. Additional Qualitative Results

In Fig. 1, 2 and 3, we visualized additional qualitative results of our MetaSeg and the previous state-of-the-art method on ADE20K, Cityscapes, COCO-Stuff datasets, respectively. Compared to SegNeXt [3], our MetaSeg showed more accurate predictions for large regions. Our MetaSeg also predicted more detailed for the object boundaries than SegNeXt [3]. In addition, we visualized more qualitative results of our MetaSeg and HiFormer [4] on Synapse dataset. As shown in Fig. 4, our MetaSeg predicted more precisely than HiFormer [4] for various categories. These

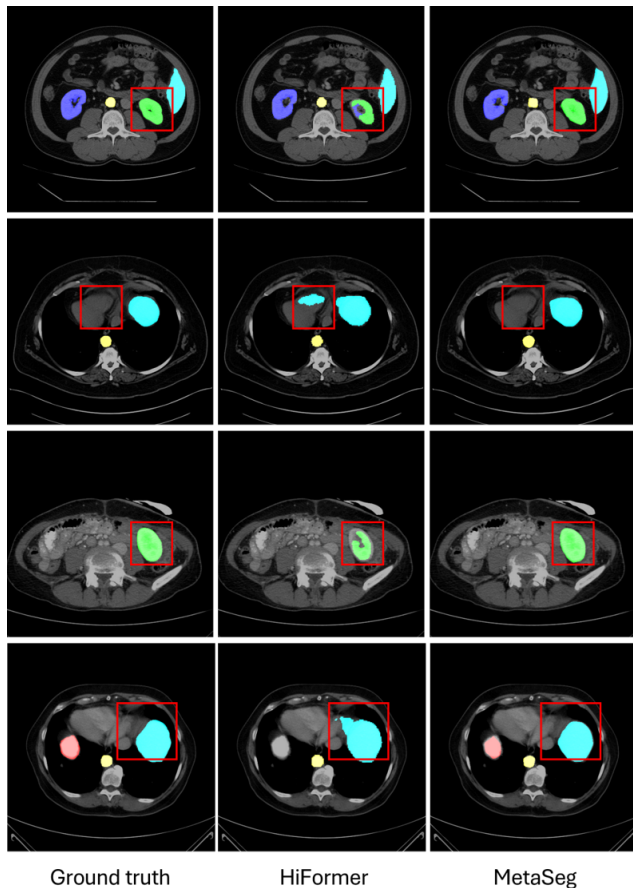

Figure 4. Qualitative results on Synapse. Our MetaSeg predicts more precisely than HiFormer [4] across various categories.

results indicate that our MetaSeg can effectively capture the local to global information by extensively leveraging the MetaFormer architecture from the encoder to the decoder.

## References

- [1] Liang-Chieh Chen, George Papandreou, Florian Schroff, and Hartwig Adam. Rethinking atrous convolution for semantic image segmentation. *arXiv preprint arXiv:1706.05587*, 2017. 1
- [2] Liang-Chieh Chen, Yukun Zhu, George Papandreou, Florian Schroff, and Hartwig Adam. Encoder-decoder with atrous separable convolution for semantic image segmentation. In *Proceedings of the European conference on computer vision (ECCV)*, pages 801–818, 2018. 1
- [3] Meng-Hao Guo, Cheng-Ze Lu, Qibin Hou, Zhengning Liu, Ming-Ming Cheng, and Shi-Min Hu. Segnext: Rethinking convolutional attention design for semantic segmentation. *arXiv preprint arXiv:2209.08575*, 2022. 1, 2
- [4] Moein Heidari, Amirhossein Kazerooni, Milad Soltany, Reza Azad, Ehsan Khodapanah Aghdam, Julien Cohen-Adad, and Dorit Merhof. Hiformer: Hierarchical multi-scale representations using transformers for medical image segmentation. In *Proceedings of the IEEE/CVF Winter Conference on Applications of Computer Vision*, pages 6202–6212, 2023. 2, 3
- [5] Jonathan Long, Evan Shelhamer, and Trevor Darrell. Fully convolutional networks for semantic segmentation. In *Proceedings of the IEEE conference on computer vision and pattern recognition*, pages 3431–3440, 2015. 1
- [6] Mark Sandler, Andrew Howard, Menglong Zhu, Andrey Zhmoginov, and Liang-Chieh Chen. Mobilenetv2: Inverted residuals and linear bottlenecks. In *Proceedings of the IEEE conference on computer vision and pattern recognition*, pages 4510–4520, 2018. 1
- [7] Jae-hun Shim, Hyunwoo Yu, Kyeongbo Kong, and Suk-ju Kang. Feedformer: Revisiting transformer decoder for efficient semantic segmentation. *Proceedings of the AAAI Conference on Artificial Intelligence*, pages 2263–2271, 2023. 1, 2
- [8] Enze Xie, Wenhai Wang, Zhiding Yu, Anima Anandkumar, Jose M Alvarez, and Ping Luo. Segformer: Simple and efficient design for semantic segmentation with transformers. *Advances in Neural Information Processing Systems*, 34:12077–12090, 2021. 1, 2
- [9] Chenglin Yang, Yilin Wang, Jianming Zhang, He Zhang, Zijun Wei, Zhe Lin, and Alan Yuille. Lite vision transformer with enhanced self-attention. In *Proceedings of the IEEE/CVF Conference on Computer Vision and Pattern Recognition*, pages 11998–12008, 2022. 1
- [10] Hengshuang Zhao, Jianping Shi, Xiaojuan Qi, Xiaogang Wang, and Jiaya Jia. Pyramid scene parsing network. In *Proceedings of the IEEE conference on computer vision and pattern recognition*, pages 2881–2890, 2017. 1
